# Supplementary material
Source: PubMed Central journal article supplement (PMC8531985)
Supplement: NEJMc2115596_disclosures.pdf [file NEJMc2115596_disclosures.pdf]

**Disclosure Purpose:** 21-15596

**Summary of Interests**

I do not have any interests to disclose at this time.

**Additional Questions:**

- 1. **Are there other relationships or activities that readers could perceive to have influenced, or that give the appearance of potentially influencing, what you wrote in the submitted work?**  
No.
- 2. **What is the manuscript title?**  
Differential Kinetics of Immune Responses Elicited by COVID-19 Vaccines
- 3. **Are you the corresponding author?**  
No.

**Certification**

I certify that the information provided in this disclosure is complete and accurate.

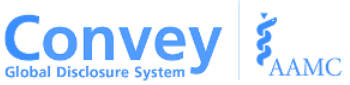

**Disclosure Purpose:** 21-15596

**Summary of Interests**

I do not have any interests to disclose at this time.

**Additional Questions:**

- 1. **Are there other relationships or activities that readers could perceive to have influenced, or that give the appearance of potentially influencing, what you wrote in the submitted work?**  
No.
- 2. **What is the manuscript title?**  
Differential Kinetics of Immune Responses Elicited by COVID-19 Vaccines
- 3. **Are you the corresponding author?**  
No.

**Certification**

I certify that the information provided in this disclosure is complete and accurate.



Disclosure Purpose: 21-15596

Summary of Interests

**Company or Organization**

| Entity                                                                                        | Type       | Interest Held By                                       |
|-----------------------------------------------------------------------------------------------|------------|--------------------------------------------------------|
| Leyden Labs                                                                                   | Employment | Self                                                   |
| <i>Title:</i> Senior Director and Head of Platform Research<br><i>Additional Information:</i> |            | <i>Position Description:</i> guide scientific strategy |
| SeromYx Systems, Inc                                                                          | Employment | Self                                                   |
| <i>Title:</i> chief scientific officer<br><i>Additional Information:</i>                      |            | <i>Position Description:</i> guide scientific strategy |

Additional Questions:

- Are there other relationships or activities that readers could perceive to have influenced, or that give the appearance of potentially influencing, what you wrote in the submitted work?**  
No.
- What is the manuscript title?**  
Differential Kinetics of Immune Responses Elicited by COVID-19 Vaccines
- Are you the corresponding author?**  
No.

Certification

I certify that the information provided in this disclosure is complete and accurate.

**Disclosure Purpose:** 21-15596

**Summary of Interests**

I do not have any interests to disclose at this time.

**Additional Questions:**

- 1. **Are there other relationships or activities that readers could perceive to have influenced, or that give the appearance of potentially influencing, what you wrote in the submitted work?**  
No.
- 2. **What is the manuscript title?**  
Differential Kinetics of Immune Responses Elicited by COVID-19 Vaccines
- 3. **Are you the corresponding author?**  
No.

**Certification**

I certify that the information provided in this disclosure is complete and accurate.

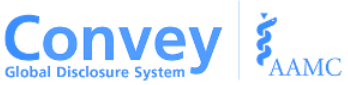

**Disclosure Purpose:** 21-15596

**Summary of Interests**

I do not have any interests to disclose at this time.

**Additional Questions:**

- 1. **Are there other relationships or activities that readers could perceive to have influenced, or that give the appearance of potentially influencing, what you wrote in the submitted work?**  
No.
- 2. **What is the manuscript title?**  
Differential Kinetics of Immune Responses Elicited by COVID-19 Vaccines
- 3. **Are you the corresponding author?**  
No.

**Certification**

I certify that the information provided in this disclosure is complete and accurate.

**Disclosure Purpose:** 21-15596

**Summary of Interests**

I do not have any interests to disclose at this time.

**Additional Questions:**

- 1. **Are there other relationships or activities that readers could perceive to have influenced, or that give the appearance of potentially influencing, what you wrote in the submitted work?**  
No.
- 2. **What is the manuscript title?**  
Differential Kinetics of Immune Responses Elicited by COVID-19 Vaccines
- 3. **Are you the corresponding author?**  
No.

**Certification**

I certify that the information provided in this disclosure is complete and accurate.

**Disclosure Purpose:** 21-15596

### Summary of Interests

I do not have any interests to disclose at this time.

### Additional Questions:

1. **Are there other relationships or activities that readers could perceive to have influenced, or that give the appearance of potentially influencing, what you wrote in the submitted work?**  
Yes.
  - a. **Please describe those relationships.**  
I have performed previous research on the Moderna and Janssen COVID19 vaccines.
2. **What is the manuscript title?**  
Differential Kinetics of Immune Responses Elicited by COVID-19 Vaccines
3. **Are you the corresponding author?**  
No.

### Certification

I certify that the information provided in this disclosure is complete and accurate.

Disclosure Purpose: 21-15596

## Summary of Interests

### Company or Organization

| Entity                                                                                                                         | Type             | Interest Held By                                                                |
|--------------------------------------------------------------------------------------------------------------------------------|------------------|---------------------------------------------------------------------------------|
| <a href="#">Alkermes, Inc.</a>                                                                                                 | Grant / Contract | Self                                                                            |
| <i>Recipient Name:</i> Dan Barouch<br><i>Grant / Contract Description:</i> contract research<br><i>Additional Information:</i> |                  | <i>Recipient Type:</i> Institution<br><i>Grant / Contract Purpose:</i> Research |
| <a href="#">Avidea</a>                                                                                                         | Consultant       | Self                                                                            |
| <i>Category:</i> Consultant<br><i>Additional Information:</i>                                                                  |                  | <i>Description:</i>                                                             |
| <a href="#">BARDA</a>                                                                                                          | Grant / Contract | Self                                                                            |
| <i>Recipient Name:</i> Dan Barouch<br><i>Grant / Contract Description:</i> contract research<br><i>Additional Information:</i> |                  | <i>Recipient Type:</i> Institution<br><i>Grant / Contract Purpose:</i> Research |
| <a href="#">Bill and Melinda Gates Foundation</a>                                                                              | Grant / Contract | Self                                                                            |
| <i>Recipient Name:</i> Dan Barouch<br><i>Grant / Contract Description:</i> academic research<br><i>Additional Information:</i> |                  | <i>Recipient Type:</i> Institution<br><i>Grant / Contract Purpose:</i> Research |
| <a href="#">Celsion</a>                                                                                                        | Consultant       | Self                                                                            |
| <i>Category:</i> Consultant<br><i>Additional Information:</i>                                                                  |                  | <i>Description:</i> consultant                                                  |
| <a href="#">CureVac</a>                                                                                                        | Grant / Contract | Self                                                                            |
| <i>Recipient Name:</i> Dan Barouch<br><i>Grant / Contract Description:</i> contract research<br><i>Additional Information:</i> |                  | <i>Recipient Type:</i> Institution<br><i>Grant / Contract Purpose:</i> Research |
| <a href="#">DARPA</a>                                                                                                          | Grant / Contract | Self                                                                            |
| <i>Recipient Name:</i> Dan Barouch<br><i>Grant / Contract Description:</i> academic research<br><i>Additional Information:</i> |                  | <i>Recipient Type:</i> Institution<br><i>Grant / Contract Purpose:</i> Research |
| <a href="#">Gilead Sciences</a>                                                                                                | Grant / Contract | Self                                                                            |
| <i>Recipient Name:</i> Dan Barouch<br><i>Grant / Contract Description:</i> contract research<br><i>Additional Information:</i> |                  | <i>Recipient Type:</i> Institution<br><i>Grant / Contract Purpose:</i> Research |
| <a href="#">Henry Jackson Foundation</a>                                                                                       | Grant / Contract | Self                                                                            |
| <i>Recipient Name:</i> Dan Barouch<br><i>Grant / Contract Description:</i> academic research<br><i>Additional Information:</i> |                  | <i>Recipient Type:</i> Institution<br><i>Grant / Contract Purpose:</i> Research |
| <a href="#">Intima Biosciences</a>                                                                                             | Grant / Contract | Self                                                                            |
| <i>Recipient Name:</i> Dan Barouch<br><i>Grant / Contract Description:</i> contract research<br><i>Additional Information:</i> |                  | <i>Recipient Type:</i> Institution<br><i>Grant / Contract Purpose:</i> Research |
| <a href="#">Janssen Research and Development</a>                                                                               | Grant / Contract | Self                                                                            |
| <i>Recipient Name:</i> Dan Barouch<br><i>Grant / Contract Description:</i> contract research<br><i>Additional Information:</i> |                  | <i>Recipient Type:</i> Institution<br><i>Grant / Contract Purpose:</i> Research |
| <a href="#">Laronde</a>                                                                                                        | Consultant       | Self                                                                            |
| <i>Category:</i> Consultant<br><i>Additional Information:</i>                                                                  |                  | <i>Description:</i>                                                             |



|                                                                                                                                 |                  |      |
|---------------------------------------------------------------------------------------------------------------------------------|------------------|------|
| <b>Legend Biotech</b>                                                                                                           | Grant / Contract | Self |
| <i>Recipient Name:</i> Dan Barouch<br><i>Grant / Contract Description:</i> contract research<br><i>Additional Information:</i>  |                  |      |
| <i>Recipient Type:</i> Institution<br><i>Grant / Contract Purpose:</i> Research                                                 |                  |      |
| <b>Massachusetts Consortium on Pathogen Readiness (MassCPR)</b>                                                                 | Grant / Contract | Self |
| <i>Recipient Name:</i> Dan Barouch<br><i>Grant / Contract Description:</i> academic research<br><i>Additional Information:</i>  |                  |      |
| <i>Recipient Type:</i> Institution<br><i>Grant / Contract Purpose:</i> Research                                                 |                  |      |
| <b>Meissa</b>                                                                                                                   | Consultant       | Self |
| <i>Category:</i> Consultant<br><i>Additional Information:</i>                                                                   |                  |      |
| <i>Description:</i>                                                                                                             |                  |      |
| <b>MRC</b>                                                                                                                      | Grant / Contract | Self |
| <i>Recipient Name:</i> Dan Barouch<br><i>Grant / Contract Description:</i> academic research<br><i>Additional Information:</i>  |                  |      |
| <i>Recipient Type:</i> Institution<br><i>Grant / Contract Purpose:</i> Research                                                 |                  |      |
| <b>Musk Foundation</b>                                                                                                          | Grant / Contract | Self |
| <i>Recipient Name:</i> Dan Barouch<br><i>Grant / Contract Description:</i> academic research<br><i>Additional Information:</i>  |                  |      |
| <i>Recipient Type:</i> Institution<br><i>Grant / Contract Purpose:</i> Research                                                 |                  |      |
| <b>NIH</b>                                                                                                                      | Grant / Contract | Self |
| <i>Recipient Name:</i> Dan Barouch<br><i>Grant / Contract Description:</i> academic research<br><i>Additional Information:</i>  |                  |      |
| <i>Recipient Type:</i> Institution<br><i>Grant / Contract Purpose:</i> Research                                                 |                  |      |
| <b>Pfizer</b>                                                                                                                   | Consultant       | Self |
| <i>Category:</i> Consultant<br><i>Additional Information:</i>                                                                   |                  |      |
| <i>Description:</i> consultant                                                                                                  |                  |      |
| <b>Ragon Institute</b>                                                                                                          | Grant / Contract | Self |
| <i>Recipient Name:</i> Dan Barouch<br><i>Grant / Contract Description:</i> academic research<br><i>Additional Information:</i>  |                  |      |
| <i>Recipient Type:</i> Institution<br><i>Grant / Contract Purpose:</i> Research                                                 |                  |      |
| <b>Regeneron Pharmaceuticals</b>                                                                                                | Grant / Contract | Self |
| <i>Recipient Name:</i> Dan Barouch<br><i>Grant / Contract Description:</i> manuscript support<br><i>Additional Information:</i> |                  |      |
| <i>Recipient Type:</i> Institution<br><i>Grant / Contract Purpose:</i> Other - manuscript support                               |                  |      |
| <b>SANOFI PASTEUR INC.</b>                                                                                                      | Grant / Contract | Self |
| <i>Recipient Name:</i> Dan Barouch<br><i>Grant / Contract Description:</i> contract research<br><i>Additional Information:</i>  |                  |      |
| <i>Recipient Type:</i> Institution<br><i>Grant / Contract Purpose:</i> Research                                                 |                  |      |
| <b>SQZ Biotech</b>                                                                                                              | Consultant       | Self |
| <i>Category:</i> Consultant<br><i>Additional Information:</i>                                                                   |                  |      |
| <i>Description:</i> consultant                                                                                                  |                  |      |
| <b>Vector Sciences</b>                                                                                                          | Stock            | Self |
| <i>Additional Information:</i>                                                                                                  |                  |      |
| <b>Zentalis</b>                                                                                                                 | Grant / Contract | Self |
| <i>Recipient Name:</i> Dan Barouch<br><i>Grant / Contract Description:</i> contract research<br><i>Additional Information:</i>  |                  |      |
| <i>Recipient Type:</i> Institution<br><i>Grant / Contract Purpose:</i> Research                                                 |                  |      |

## Intellectual Property

| Type                                                                                                                                                                         | Is Licensed  | Interest Held By |
|------------------------------------------------------------------------------------------------------------------------------------------------------------------------------|--------------|------------------|
| <b>Patent - COMPOSITIONS AND METHODS FOR TREATING CORONAVIRU ...</b>                                                                                                         | Yes          | Self             |
| <i>Description:</i> COMPOSITIONS AND METHODS FOR TREATING CORONAVIRUS INFECTION<br><i>Patent Status:</i> Provisional<br><i>Filing Jurisdiction:</i> USA<br><i>Licensees:</i> |              |                  |
| <i>Patent Number:</i> 63/135,182<br><i>Patent Holder:</i> Current Institution<br><i>Additional Information:</i>                                                              |              |                  |
| <b>Licensee</b>                                                                                                                                                              | <b>Title</b> | <b>Date</b>      |
|                                                                                                                                                                              |              |                  |

Janssen Research and Development

**Patent - COMPOSITIONS AND METHODS FOR TREATING CORONAVIRU ...**

Yes

Self

*Description:* COMPOSITIONS AND METHODS FOR TREATING CORONAVIRUS INFECTION

*Patent Status:* Provisional

*Filing Jurisdiction:* USA

*Licensees:*

| Licensee                         | Title | Date |
|----------------------------------|-------|------|
| Janssen Research and Development |       |      |

*Patent Number:* 63/121,482

*Patent Holder:* Current Institution

*Additional Information:*

**Patent - COMPOSITIONS AND METHODS FOR TREATING CORONAVIRU ...**

Yes

Self

*Description:* COMPOSITIONS AND METHODS FOR TREATING CORONAVIRUS INFECTION

*Patent Status:* Provisional

*Filing Jurisdiction:* USA

*Licensees:*

| Licensee                         | Title | Date |
|----------------------------------|-------|------|
| Janssen Research and Development |       |      |

*Patent Number:* 63/133,969

*Patent Holder:* Current Institution

*Additional Information:*

**Patent - COMPOSITIONS AND METHODS FOR TREATING CORONAVIRU ...**

Yes

Self

*Description:* COMPOSITIONS AND METHODS FOR TREATING CORONAVIRUS INFECTION

*Patent Status:* Provisional

*Filing Jurisdiction:* USA

*Licensees:*

| Licensee                         | Title | Date |
|----------------------------------|-------|------|
| Janssen Research and Development |       |      |

*Patent Number:* 3,101,131

*Patent Holder:* Current Institution

*Additional Information:*

**Additional Questions:**

1. **Are there other relationships or activities that readers could perceive to have influenced, or that give the appearance of potentially influencing, what you wrote in the submitted work?**

No.

2. **What is the manuscript title?**

Differential Kinetics of Immune Responses Elicited by COVID-19 Vaccines

3. **Are you the corresponding author?**

Yes.

- a. **Please list the other authors' names here.**

Ai-ris Y. COLLIER, MD,1 Jingyou YU, PhD,1 Katherine MCMAHAN, MS,1 Jinyan LIU, PhD,1 Abishek CHANDRASHEKAR, MS,1 Jenny S. MARON, BS,2 Caroline ATYEO, MS,2 David R. MARTINEZ, PhD,3 Jessica L. ANSEL, NP,1 Ricardo AGUAYO, BS,1 Marjorie ROWE, BS,1 Catherine JACOB-DOLAN, BS,1 Daniel SELLERS, BS,1 Julia BARRETT, BS,1 Kunza AHMAD, MS,1 Tochi ANIOKE, BS,1 Haley VANWYK, BS,1 Sarah GARDNER, BS,1 Olivia POWERS, BS,1 Esther A. BONDZIE, BA,1 Huahua WAN, MS,1 Ralph S. BARIC, PhD,3 Galit ALTER, PhD,2 Michele R. HACKER, ScD,1 Dan H. BAROUCH, MD, PhD 1\*

**Certification**

I certify that the information provided in this disclosure is complete and accurate.

**Disclosure Purpose:** 21-15596

Summary of Interests

I do not have any interests to disclose at this time.

Additional Questions:

- 1. **Are there other relationships or activities that readers could perceive to have influenced, or that give the appearance of potentially influencing, what you wrote in the submitted work?**  
No.
- 2. **What is the manuscript title?**  
Differential Kinetics of Immune Responses Elicited by COVID-19 Vaccines
- 3. **Are you the corresponding author?**  
No.

Certification

I certify that the information provided in this disclosure is complete and accurate.

**Disclosure Purpose:** 21-15596

### Summary of Interests

I do not have any interests to disclose at this time.

### Additional Questions:

- Are there other relationships or activities that readers could perceive to have influenced, or that give the appearance of potentially influencing, what you wrote in the submitted work?**  
No.
- What is the manuscript title?**  
Differential Kinetics of Immune Responses Elicited by COVID-19 Vaccines
- Are you the corresponding author?**  
No.

### Certification

I certify that the information provided in this disclosure is complete and accurate.

**Disclosure Purpose:** 21-15596

### Summary of Interests

I do not have any interests to disclose at this time.

### Additional Questions:

- Are there other relationships or activities that readers could perceive to have influenced, or that give the appearance of potentially influencing, what you wrote in the submitted work?**  
No.
- What is the manuscript title?**  
Differential Kinetics of Immune Responses Elicited by COVID-19 Vaccines
- Are you the corresponding author?**  
No.

### Certification

I certify that the information provided in this disclosure is complete and accurate.

Disclosure Purpose: 21-15596

Summary of Interests

**Company or Organization**

| Entity                                                                                                                                                                               | Type             | Interest Held By |
|--------------------------------------------------------------------------------------------------------------------------------------------------------------------------------------|------------------|------------------|
| <a href="#">Burroughs Wellcome Fund</a>                                                                                                                                              | Grant / Contract | Self             |
| <i>Recipient Name:</i> Ai-ris Collier<br><i>Grant / Contract Description:</i> In support of the Reproductive Scientist Development Program Scholar<br><i>Additional Information:</i> |                  |                  |
| <i>Recipient Type:</i> Individual<br><i>Grant / Contract Purpose:</i> Research                                                                                                       |                  |                  |
| <a href="#">Eunice Kennedy Shriver National Institute of Child Health and Human Development</a>                                                                                      | Grant / Contract | Self             |
| <i>Recipient Name:</i> Ai-ris Collier<br><i>Grant / Contract Description:</i> Reproductive Scientist Development Program HD000849<br><i>Additional Information:</i>                  |                  |                  |
| <i>Recipient Type:</i> Individual<br><i>Grant / Contract Purpose:</i> Research                                                                                                       |                  |                  |

Additional Questions:

- Are there other relationships or activities that readers could perceive to have influenced, or that give the appearance of potentially influencing, what you wrote in the submitted work?**  
No.
- What is the manuscript title?**  
Differential Kinetics of Immune Responses Elicited by COVID-19 Vaccines
- Are you the corresponding author?**  
No.

Certification

I certify that the information provided in this disclosure is complete and accurate.



**Disclosure Purpose:** 21-15596

**Summary of Interests**

I do not have any interests to disclose at this time.

**Additional Questions:**

- 1. **Are there other relationships or activities that readers could perceive to have influenced, or that give the appearance of potentially influencing, what you wrote in the submitted work?**  
No.
- 2. **What is the manuscript title?**  
Differential Kinetics of Immune Responses Elicited by COVID-19 Vaccines
- 3. **Are you the corresponding author?**  
No.

**Certification**

I certify that the information provided in this disclosure is complete and accurate.



Disclosure Purpose: 21-15596

Summary of Interests

**Company or Organization**

| Entity                                                                                                                                                             | Type             | Interest Held By                                                                                                                                   |
|--------------------------------------------------------------------------------------------------------------------------------------------------------------------|------------------|----------------------------------------------------------------------------------------------------------------------------------------------------|
| National Institutes of Health                                                                                                                                      | Grant / Contract | Self                                                                                                                                               |
| <i>Recipient Name:</i> Lee Nadler<br><i>Grant / Contract Description:</i> Harvard Catalyst (Harvard Clinical and Translational Science Center)<br>NIH UL1 TR002541 |                  | <i>Recipient Type:</i> Institution<br><i>Grant / Contract Purpose:</i> Research<br><i>Additional Information:</i> Salary support to my institution |

Additional Questions:

- Are there other relationships or activities that readers could perceive to have influenced, or that give the appearance of potentially influencing, what you wrote in the submitted work?**  
No.
- What is the manuscript title?**  
Differential Kinetics of Immune Responses Elicited by COVID-19 Vaccines
- Are you the corresponding author?**  
No.

Certification

I certify that the information provided in this disclosure is complete and accurate.



**Disclosure Purpose:** 21-15596

**Summary of Interests**

I do not have any interests to disclose at this time.

**Additional Questions:**

- 1. **Are there other relationships or activities that readers could perceive to have influenced, or that give the appearance of potentially influencing, what you wrote in the submitted work?**  
No.
- 2. **What is the manuscript title?**  
Differential Kinetics of Immune Responses Elicited by COVID-19 Vaccines
- 3. **Are you the corresponding author?**  
No.

**Certification**

I certify that the information provided in this disclosure is complete and accurate.

**Disclosure Purpose:** 21-15596

**Summary of Interests**

I do not have any interests to disclose at this time.

**Additional Questions:**

- 1. **Are there other relationships or activities that readers could perceive to have influenced, or that give the appearance of potentially influencing, what you wrote in the submitted work?**  
No.
- 2. **What is the manuscript title?**  
Differential Kinetics of Immune Responses Elicited by COVID-19 Vaccines
- 3. **Are you the corresponding author?**  
No.

**Certification**

I certify that the information provided in this disclosure is complete and accurate.



**Disclosure Purpose:** 21-15596

Summary of Interests

I do not have any interests to disclose at this time.

Additional Questions:

- 1. **Are there other relationships or activities that readers could perceive to have influenced, or that give the appearance of potentially influencing, what you wrote in the submitted work?**  
No.
- 2. **What is the manuscript title?**  
Differential Kinetics of Immune Responses Elicited by COVID-19 Vaccines
- 3. **Are you the corresponding author?**  
No.

Certification

I certify that the information provided in this disclosure is complete and accurate.

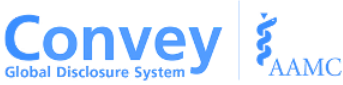

**Disclosure Purpose:** 21-15596

## Summary of Interests

| Company or Organization                                                                                                                                                             | Type             | Interest Held By                                                               |
|-------------------------------------------------------------------------------------------------------------------------------------------------------------------------------------|------------------|--------------------------------------------------------------------------------|
| <b>Burroughs Wellcome Fund</b>                                                                                                                                                      | Grant / Contract | Self                                                                           |
| <i>Recipient Name:</i> David R. Martinez<br><i>Grant / Contract Description:</i> Postdoctoral Enrichment Award<br><i>Additional Information:</i> This grant supports my research.   |                  | <i>Recipient Type:</i> Individual<br><i>Grant / Contract Purpose:</i> Research |
| <b>Howard Hughes Medical Institute</b>                                                                                                                                              | Grant / Contract | Self                                                                           |
| <i>Recipient Name:</i> David R. Martinez<br><i>Grant / Contract Description:</i> Hanna H Gray Fellowship<br><i>Additional Information:</i> This grant supports my research program. |                  | <i>Recipient Type:</i> Individual<br><i>Grant / Contract Purpose:</i> Research |

## Additional Questions:

- Are there other relationships or activities that readers could perceive to have influenced, or that give the appearance of potentially influencing, what you wrote in the submitted work?**  
No.
- What is the manuscript title?**  
Differential Kinetics of Immune Responses Elicited by COVID-19 Vaccines
- Are you the corresponding author?**  
No.

## Certification

I certify that the information provided in this disclosure is complete and accurate.

**Disclosure Purpose:** 21-15596

**Summary of Interests**

I do not have any interests to disclose at this time.

**Additional Questions:**

- 1. **Are there other relationships or activities that readers could perceive to have influenced, or that give the appearance of potentially influencing, what you wrote in the submitted work?**  
No.
- 2. **What is the manuscript title?**  
Differential Kinetics of Immune Responses Elicited by COVID-19 Vaccines
- 3. **Are you the corresponding author?**  
No.

**Certification**

I certify that the information provided in this disclosure is complete and accurate.

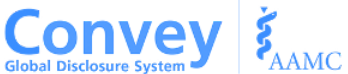

**Disclosure Purpose:** 21-15596

Summary of Interests

I do not have any interests to disclose at this time.

Additional Questions:

- 1. **Are there other relationships or activities that readers could perceive to have influenced, or that give the appearance of potentially influencing, what you wrote in the submitted work?**  
No.
- 2. **What is the manuscript title?**  
Differential Kinetics of Immune Responses Elicited by COVID-19 Vaccines
- 3. **Are you the corresponding author?**  
No.

Certification

I certify that the information provided in this disclosure is complete and accurate.

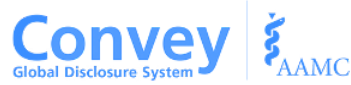

**Disclosure Purpose:** 21-15596

### Summary of Interests

I do not have any interests to disclose at this time.

### Additional Questions:

- Are there other relationships or activities that readers could perceive to have influenced, or that give the appearance of potentially influencing, what you wrote in the submitted work?**  
No.
- What is the manuscript title?**  
Differential Kinetics of Immune Responses Elicited by COVID-19 Vaccines
- Are you the corresponding author?**  
No.

### Certification

I certify that the information provided in this disclosure is complete and accurate.

**Disclosure Purpose:** 21-15596

**Summary of Interests**

I do not have any interests to disclose at this time.

**Additional Questions:**

- 1. **Are there other relationships or activities that readers could perceive to have influenced, or that give the appearance of potentially influencing, what you wrote in the submitted work?**  
No.
- 2. **What is the manuscript title?**  
Differential Kinetics of Immune Responses Elicited by COVID-19 Vaccines
- 3. **Are you the corresponding author?**  
No.

**Certification**

I certify that the information provided in this disclosure is complete and accurate.





**Disclosure Purpose:** 21-15596

**Summary of Interests**

I do not have any interests to disclose at this time.

**Additional Questions:**

- 1. **Are there other relationships or activities that readers could perceive to have influenced, or that give the appearance of potentially influencing, what you wrote in the submitted work?**  
No.
- 2. **What is the manuscript title?**  
Differential Kinetics of Immune Responses Elicited by COVID-19 Vaccines
- 3. **Are you the corresponding author?**  
No.

**Certification**

I certify that the information provided in this disclosure is complete and accurate.

**Disclosure Purpose:** 21-15596

### Summary of Interests

I do not have any interests to disclose at this time.

### Additional Questions:

- Are there other relationships or activities that readers could perceive to have influenced, or that give the appearance of potentially influencing, what you wrote in the submitted work?**  
No.
- What is the manuscript title?**  
Differential Kinetics of Immune Responses Elicited by COVID-19 Vaccines
- Are you the corresponding author?**  
No.

### Certification

I certify that the information provided in this disclosure is complete and accurate.

**Disclosure Purpose:** 21-15596

**Summary of Interests**

I do not have any interests to disclose at this time.

**Additional Questions:**

- 1. **Are there other relationships or activities that readers could perceive to have influenced, or that give the appearance of potentially influencing, what you wrote in the submitted work?**  
No.
- 2. **What is the manuscript title?**  
Differential Kinetics of Immune Responses Elicited by COVID-19 Vaccines
- 3. **Are you the corresponding author?**  
No.

**Certification**

I certify that the information provided in this disclosure is complete and accurate.
